# 1 **Redundancy Circuits of the Commissural Pathways in Human** 2 **and Rhesus Macaque Brains**

3 Zulfar Ghulam-Jelani<sup>1,2</sup>, Jessica Barrios-Martinez<sup>1</sup>, Aldo Eguiluz-Melendez<sup>1</sup>, Ricardo Gomez<sup>1</sup>, Yury  
4 Anania<sup>1</sup>, Fang-Cheng Yeh<sup>1,3,\*</sup>

5 <sup>1</sup>Department of Neurological Surgery, University of Pittsburgh Medical Center, Pittsburgh,  
6 Pennsylvania, USA

7 <sup>2</sup>Department of Biomedical Engineering, Carnegie Mellon University, Pittsburgh, Pennsylvania, USA

8 <sup>3</sup>Department of Bioengineering, University of Pittsburgh, Pittsburgh, Pennsylvania, USA

9  
10 \*Correspondence to:

11 Fang-Cheng (Frank) Yeh

12 Assistant Professor

13 Department of Neurological Surgery

14 UPMC Presbyterian, Suite B-400

15 200 Lothrop Street

16 Pittsburgh, PA 15213

17 TEL: 412-383-0871

18 frank.yeh@pitt.edu

19

## 20 **Abstract**

21 It has been hypothesized that the human brain has traded redundancy for efficiency, but the structural  
22 existence has not been identified to examine this claim. Here, we report three redundancy circuits of the  
23 commissural pathways in primate brains, namely the orbitofrontal, temporal, and occipital redundancy  
24 circuits of the anterior commissure and corpus callosum. Each redundancy circuit has two distinctly  
25 separated routes connecting a common pair of cortical regions. We mapped their trajectories in human  
26 and rhesus macaque brains using individual and population-averaged tractography. The dissection results  
27 confirmed the existence of these redundancy circuits connecting the orbitofrontal lobe, amygdala, and  
28 visual cortex. The volume analysis showed a significant reduction in the orbitofrontal and occipital  
29 redundancy circuits of the human brain, whereas the temporal redundancy circuit had a substantial  
30 organizational difference between the human and rhesus macaque. Our overall findings suggest that the  
31 human brain is more efficient in the commissural pathway, as shown by the significantly reduced volume  
32 of the anterior commissure which serves as the backup connections for the corpus callosum. This reduction  
33 of the redundancy circuit may explain why humans are more vulnerable to psychiatric brain disorders  
34 stemming from the corpus callosum compared to non-human primates.

35

36 **Keywords:** redundancy circuits, corpus callosum, anterior commissure, tractography, neuroanatomy

37

38

39

40

41

42 **Significance:**

43 We report and describe the connection routes of three redundancy circuits of the commissural pathways  
44 in human and rhesus macaque brains and compare their volumes. Our tractography and dissection studies  
45 confirmed that the human brain has smaller redundancy circuits. This is the first time such redundancy  
46 circuits of the commissural pathways have been identified, and their differences quantified in human and  
47 rhesus macaque to verify the redundancy-efficiency tradeoff hypothesis. The findings provide new insight  
48 into the topological organization of the human brain and may help understand the circuit mechanism of  
49 brain disorders involving these pathways.

50

51 **Introduction**

52 It has been hypothesized that the human brain has traded-off redundancy for efficiency to allocate  
53 connectivity for higher cognitive functioning such as intelligence (Marsman et al, 2017). Recently, Pryluk  
54 et al. highlighted that human neurons have more efficient encoding than monkeys (Pryluk et al., 2019).  
55 They suggested that humans have traded off robustness for efficiency and hypothesized that the human  
56 brain may be more susceptible to psychiatric disorders. At the macroscopic level, the efficiency of a brain  
57 network can be defined and quantified using the graph analysis (Bullmore and Sporns, 2009). A recent  
58 structural connectome study using a population-averaged template of young adults has shown that  
59 commissural pathways—the anterior commissure and corpus callosum—contribute to most of the brain  
60 network efficiency due to their long-range connections between the two hemispheres (Yeh et al., 2018).  
61 Studies have also shown that functional connections are organized as a highly efficient system in the  
62 human brain (Sporns et al, 2004; Stam, 2004; Eguiluz et al., 2005; Achard et al., 2006; van den Heuvel  
63 et al., 2008). These findings suggest a relationship between efficiency and intelligence. However, there is

64 no structural connectome evidence showing that the topological organization of the human brain is more  
65 efficient or has traded-off robustness with efficiency.

66

67 To investigate this efficiency trade-off hypothesis at the commissural pathways, here we focus on a  
68 specific structural organization called the “redundancy circuit.” We define a redundancy circuit as a  
69 network of the brain structure that includes two distinctly separated white matter pathways connecting  
70 two common functional areas to form a fail-safe connection to ensure robustness (Fig. 1a). The separated  
71 white matter connections may increase neuronal synchronization, as was observed in Pryluk’s study for  
72 monkeys (Pryluk et al., 2019). If one of the connections has an injury or agenesis, information exchange  
73 may not be interrupted entirely as an alternative pathway may be present (Fig. 1b). This redundancy  
74 connection thus has greater robustness against dysconnectivity. In this study, we hypothesize that primate  
75 brains may have structural existence of a redundancy circuit of the commissural pathways and that the  
76 human brain may have a smaller redundancy connection that trades off structural robustness for efficiency.

77

78 To examine these hypotheses, we performed diffusion magnetic resonance imaging (MRI) fiber tracking  
79 in *in-vivo* human and rhesus macaque brains as well as in a population-averaged template of 1021 young  
80 human adults and a population-averaged template of 36 rhesus macaques. We limited our search to the  
81 anterior commissure and corpus callosum to identify the existence of redundancy circuits due to our  
82 previous study showing that the commissural pathways contribute to most of the network efficiency in the  
83 human brain (Yeh et al., 2018). Trajectories of the identified redundancy circuits were then validated using  
84 cadaveric dissection to provide the tissue evidence. We then compared the volumetric differences in the  
85 redundancy circuits between the human and rhesus macaque to examine the efficiency trade-off

86 hypothesis and investigated whether the redundancy circuits of the commissural pathways in the human  
87 brain are significantly reduced in comparison with those of the rhesus macaque.

## 88 **Results**

### 89 *Redundancy circuits in the human brain*

90 Our study based in population-averaged tractography identified three redundancy circuits of the  
91 commissural pathways in the human brain (Figure 2). Figure 2a shows the axial view of three redundancy  
92 circuits we identified in the population-averaged tractography of 1021 young human adults. The three  
93 redundancy circuits are named orbitofrontal, temporal, and occipital redundancy circuits, respectively. All  
94 of them have two distinctly separate connection routes contributed from the corpus callosum and the  
95 anterior commissure, matching our definition of a redundancy circuit. Tractography results show that the  
96 orbitofrontal redundancy circuit includes the orbitofrontal branches of the anterior commissure (red) and  
97 the forceps minor of the corpus callosum (dark red). Both branches connect to the orbitofrontal cortex.  
98 The temporal redundancy circuit includes the temporal branch of the anterior commissure (green) and the  
99 tapetum of the corpus callosum (dark green). Both branches connect to the amygdala and medial temporal  
100 lobe. The occipital redundancy circuit includes the occipital branch of the anterior commissure (blue) and  
101 the forceps major of the corpus callosum (dark blue). Both connect to the visual cortex in the occipital  
102 lobe. The redundancy circuits in the human brain is also visualized in the supplementary materials (Fig.  
103 S2).

104

105 We further zoom in at the cortical regions connected by these redundancy circuits. The cortical  
106 segmentation was defined using the HCP-MMP atlas (Glasser et al., 2016). The abbreviation of the

107 connecting regions is listed in the supplementary materials (Table S1). Figure 2b shows the anterior  
108 commissure portion of the redundancy circuits. The red-colored tract is part of the orbitofrontal  
109 redundancy circuit that projects anteriorly to the orbitofrontal cortex and connects primarily to the polar  
110 10p region (10pp) and area 10v region (10v). The green-colored tract is part of the temporal redundancy  
111 circuit that projects laterally to the amygdala and connects primarily to the dorsal temporal polar cortex  
112 subregion (TGd). The tract also projects near the ventral temporal polar cortex subregion (TGv). The blue-  
113 colored tract is part of the occipital redundancy circuit that connects primarily to the primary visual cortex  
114 (V1) and partly projects to the secondary, tertiary, and quaternary visual cortices (V2, V3, and V4). Figure  
115 2c shows the corpus callosum portion of the three redundancy circuits. The dark red-colored tract  
116 corresponds to the branch of the corpus callosum that project to the orbitofrontal cortex, the dark green-  
117 colored tract to the amygdaloidal cortex, and the dark blue-colored tract to the visual cortex. Similar to  
118 the pathways in the anterior commissure, the corpus callosal branches connect to the same cortical regions,  
119 including 10pp and 10v (orbitofrontal redundancy circuit), TGd and TGv (temporal redundancy circuit),  
120 and V1, V2, V3, and V4 (occipital redundancy circuit). Although connecting regions are the same, the  
121 connection trajectories are projected from different white matter routes.

122

123 We further confirmed the existence of redundancy circuits of the commissural pathways using  
124 connectograms (Fig. 2d) for both the anterior commissure and corpus callosum. The connectograms also  
125 confirmed that both the anterior commissure and portions of the corpus callosum share the same  
126 connecting targets between the left and right hemispheres. Figure 2e shows the voxelwise location of the  
127 redundancy circuits in axial, sagittal, and coronal views for the anterior commissure and corpus callosum.  
128 The images show that target regions are connected by entirely separated routes. This fulfills our definition

129 of a redundancy circuit that two cortical regions are connected by two separate white matter tracts to form  
130 connection redundancy (Fig. 1).

### 131 *Redundancy circuits in the rhesus macaque brain*

132 We also identified three similar redundancy circuits of the commissural pathways in the rhesus macaque  
133 brain. Figure 3 shows these redundancy circuits mapped by population-averaged tractography. Fig. 3a  
134 shows the axial view of three redundancy circuits in the rhesus macaque brain of a population template  
135 averaged from 36 rhesus macaque brains. The overall fiber topology is the same as for the human shown  
136 in Fig. 2. The orbitofrontal redundancy circuit includes the orbitofrontal branches of the anterior  
137 commissure (red) and the forceps minor of the corpus callosum (dark red). The temporal redundancy  
138 circuit includes the temporal branch of the anterior commissure (green) and the tapetum of the corpus  
139 callosum (dark green). Both branches connect to the amygdala and medial temporal lobe. The occipital  
140 redundancy circuit includes the occipital branch of the anterior commissure (blue) and the forceps major  
141 of the corpus callosum (dark blue), both connecting to the visual cortex in the occipital lobe. The  
142 redundancy circuits of the human and rhesus macaque show similar fiber topology. The redundancy  
143 circuits of the commissural pathways in the rhesus macaque brain is also visualized in the supplementary  
144 materials (Fig. S3).

145

146 More detailed connecting regions of the left hemisphere in the sagittal and axial views are illustrated in  
147 Fig. 3b and Fig. 3c for the anterior commissure and corpus callosum, respectively. The cortical  
148 segmentation is defined using the CIVM rhesus atlas (Calabrese et al., 2015). The abbreviation of the  
149 connecting regions is listed in the supplementary materials (Table S1). Figure 3b shows the anterior  
150 commissure portions of three redundancy circuits of the commissural pathways. The red-colored tract is  
151 a part of the orbitofrontal redundancy circuit that projects anteriorly to the orbitofrontal cortex and

152 connects primarily to the medial and ventral parts (10M and 10V) of area 10 cortex while some  
153 connections are made within area 14 of the medial part (14M). The green-colored tract is part of the  
154 temporal redundancy circuit that projects laterally to the amygdala and connects primarily to the  
155 temporopolar prisco cortex (TPPro) region while other fibers continue to the area TL rostral part  
156 (TLR(R36)) and temporal parieto-occipital associated area in TPO. The blue-colored tract is part of the  
157 occipital redundancy circuit and connects primarily to the primary visual cortex (V1) and partly projects  
158 to the secondary, tertiary, and quaternary visual cortices (V2, V3, V4). Figure 3c shows the corpus  
159 callosum portion of the three redundancy circuits of the commissural pathways. The dark red-colored tract  
160 corresponds to the branch of the corpus callosum that project to the orbitofrontal cortex, the dark green-  
161 colored tract to the amygdaloidal cortex, and the dark blue-colored tract to the visual cortex. Similar to  
162 the pathways in the anterior commissure, the corpus callosum branches connect to the same cortical  
163 regions including the 10M, 10V, and 14M (orbitofrontal redundancy circuit), TPPro, TLR(R36), and TPO  
164 (temporal redundancy circuit), and V1, V2, V3, and V4 (occipital redundancy circuit). We further confirm  
165 the existence of redundancy circuits using connectograms (Fig. 3d) and the voxelwise projection (Fig. 3e)  
166 of the pathways. Similar to the results in the human brain, the connectograms confirmed that both the  
167 anterior commissure and part of the corpus callosum share the same connecting targets between the left  
168 and right hemispheres. The voxelwise projection images of the pathways label the white matter regions  
169 occupied by the redundancy circuits in axial, sagittal, and coronal views. The images show that the target  
170 regions are connected by entirely separated routes. Again, this fulfills our definition of a redundancy  
171 circuit that a common brain region is connected by two separated white matter tracts to form connection  
172 redundancy as we described for the human brain.



173 *Cadaveric dissections of the anterior commissure*

174 We validated our tractography findings using cadaveric dissections. Here, we did not include the corpus  
175 callosum as neuroanatomy literature has covered its structure substantially (Mooshagian, 2008; Goldstein  
176 et al., 2019). Figure 4 shows the dissection results of the anterior commissure for the human brain, and  
177 Figure 5 shows the dissection results of the anterior commissure for the rhesus macaque brain. The  
178 dissections were completed by a neuroanatomist (Dr. Aldo Eguiluz-Melendez) and labeled by three  
179 different neuroanatomists (Dr. Aldo Eguiluz-Melendez, Dr. Ricardo Gomez, and Dr. Yury Anania). The  
180 different branch projections of the anterior commissure are color-coded with dotted lines to show the  
181 orbitofrontal branch (FB, red), temporal branch (TB, green), and the occipital branch (OB, blue). The  
182 abbreviations are listed in the supplementary materials (Table S2). The inset images with the dissection  
183 pictures show the orientation of the brain. Overall, the fibers in Fig. 4 and 5 show a topology that is content  
184 with our tractography findings (Fig. 2 and Fig. 3). In the human brain, the red dotted lines in Fig. 4 show  
185 the orbitofrontal branch (FB) of the anterior commissure branching off from the main trunk in the  
186 anterior/inferior thalamus (Fig. 4a, 4c, and 4d) and projecting anteriorly to the lower frontal lobe (Fig. 4a).  
187 The remaining bundles contain the temporal branch (TB, green) and occipital branch (OB, blue), as shown  
188 in Fig. 4d and 4f. These two branches separate in the anterior temporal lobe (Fig. 4a, 4b, 4d, and 4f). The  
189 temporal branch (TB) bends anteriorly toward the amygdaloidal region (Fig. 4a, 4d, and 4f), whereas the  
190 occipital branch (OB) turns posteriorly (Fig. 4a and 4d) and projects toward the visual cortex (Fig. 4a and  
191 4e). Similarly, in the rhesus macaque brain, the red dotted lines in Fig. 5 show the orbitofrontal branch  
192 (FB) of the anterior commissure branching off from the main trunk in the anterior/inferior thalamus (Fig.  
193 5a, 5b, 5c, and 5d) and projecting anteriorly to the lower frontal lobe (Fig. 5a and 5b). The separation  
194 location of the temporal and occipital branch in the human and the rhesus macaque are the same. The  
195 separation of the temporal branch (TB, green) and the occipital branch (OB, blue) occurs in the anterior

196 temporal lobe (Fig. 5a, 5b, 5d, 5e, and 5f). The temporal branch (TB) bends anteriorly toward the  
197 amygdaloidal region (Fig. 5a, 5b, and 5d), while the occipital branch (OB) turns posteriorly (Fig. 5a, 5b,  
198 and 5f) and projects towards the visual cortex (Fig. 5a, 5b, 5e, and 5f). The dissection results provided  
199 tissue evidence confirming the trajectories and termination location of the three redundancy circuits  
200 identified by tractography. Moreover, the dissection results also show that the rhesus macaque brain has  
201 a relatively larger volume of the occipital redundancy circuits compared to the human brain.

### 202 *Volumetric comparison between the human and rhesus macaques*

203 We further performed a volumetric comparison between the human and rhesus macaque brains to test our  
204 hypothesis that the human brain has less redundancy in the connection circuit of the commissural  
205 pathways. As illustrated in Fig. 6, by using the tract volume fraction quantified by the total volume of tract  
206 divided by brain volume. We obtained the volume fraction using 27 human subjects and 30 rhesus  
207 macaque subjects (Materials and Methods). As shown in Fig. 6a, the volume fraction of the anterior  
208 commissure component (AC), the corpus callosum component (CC), and their sum (AC+CC) in the  
209 orbitofrontal redundancy circuit in humans were all significantly smaller than that of the rhesus macaque  
210 ( $p = 0.020, 0.017, \text{ and } 0.013$ ). Although the differences were statistically significant, the effect size was  
211 not large (Cohen's  $d = 0.66, 0.62, \text{ and } 0.69$ ). Overall, the rhesus macaque brain had a slightly larger  
212 volume fraction of the orbitofrontal redundancy circuit in the corpus callosum than that of the human. Fig.  
213 6b shows the volume fraction of the temporal redundancy circuits separated into the anterior commissure  
214 component (AC), the corpus callosum component (CC), and their sum (AC+CC). Only the anterior  
215 commissure component is significantly larger in the rhesus macaque than the human ( $p = 0.025$ , Cohen's  
216  $d = 0.57$ ). Fig. 6c shows the volume fraction of the occipital redundancy circuits separated into the anterior  
217 commissure component (AC), the corpus callosum component (CC), and their sum (AC+CC). All of them  
218 were significantly and substantially smaller in the human brain ( $p = 1.52\text{E-}05, 5.93\text{E-}08, \text{ and } 6.53\text{E-}08$ ,

219 Cohen's  $d = 1.26, 1.55,$  and  $1.65$ ). Overall, all redundancy circuit of the commissural pathways presents  
220 a significant reduction in the human brain, and among these three circuits, the occipital redundancy circuit  
221 showed the most considerable reduction.

222

223 The component percentages of the redundancy circuit devoted to the anterior commissure versus the  
224 corpus callosum for the human and rhesus macaque brain are shown in Fig. 6d. Overall, the corpus  
225 callosum takes on more volume fraction in the human brain for all three redundancy circuits, particularly  
226 the temporal redundancy circuits. The orbitofrontal redundancy circuit in the human brain shows the  
227 anterior commissure and corpus callosum have component percentages of  $23.7 \pm 7.5\%$  and  $76.3 \pm 7.5\%$ ,  
228 respectively, while in the rhesus macaque brain, they are  $22.7 \pm 13.1\%$  and  $77.3 \pm 13.1\%$ . The component  
229 percentage of the corpus callosum in the human brain ( $76.3\%$ ) is not significantly different from that of  
230 rhesus macaque ( $77.3\%$ ) ( $p = 0.597$ ). For the temporal redundancy circuit, the component percentages are  
231  $23.7 \pm 7.5\%$  and  $76.3 \pm 7.5\%$  for the anterior commissure and corpus callosum, respectively. For the rhesus  
232 macaque, the percentages are  $35.7 \pm 21.4\%$  and  $64.3 \pm 21.4\%$ . The component percentage of the corpus  
233 callosum in the human brain ( $76.3\%$ ) is significantly and substantially larger than that of rhesus macaque  
234 ( $64.3\%$ ) ( $p = 0.0074, d = 3.33$ ). The occipital redundancy circuit has the largest contribution from the  
235 anterior commissure in comparison. The component percentages for the anterior commissure and corpus  
236 callosum are  $37.7 \pm 9.2\%$  and  $62.3 \pm 9.2\%$  in the human brain, and  $42.1 \pm 13.0\%$  and  $57.9 \pm 13.0\%$  in the  
237 rhesus macaque brain. The component percentage of the corpus callosum in the human brain ( $62.3\%$ ) is  
238 not significantly different from that of rhesus macaque ( $57.9\%$ ) ( $p = 0.157$ ). In summary, the orbitofrontal  
239 and occipital redundancy circuits of the commissural pathways have no significant difference in the  
240 percentages of their component connections, whereas the temporal redundancy in the human brain has a

241 much larger component percentage of the corpus callosum. This suggests that there could be a substantial  
242 organizational difference in the temporal redundancy circuit of the human brain.

## 243 **Discussion**

244 Here, we report the existence of three redundancy circuits of the commissural pathways of primate brains,  
245 namely the orbitofrontal, temporal, and occipital redundancy circuits. Each circuit has two distinctly  
246 different connecting routes contributed from parts of the anterior commissure and corpus callosum. The  
247 structural existence of these redundancy circuits in primates allows us to make a comparison to examine  
248 whether human brains have organized toward efficiency or robustness.

### 249 *The human brain is more “efficient” in the commissural pathways*

250 Our comparison of the volume ratio of the commissural pathways confirmed a significant reduction of  
251 redundancy circuits in the human brain, confirming our hypothesis that the structural topology of the  
252 human brain is organized to be more efficient in the commissural pathways. Further, component  
253 percentage analysis showed that the temporal redundancy circuits have a significant organizational  
254 difference between human and rhesus macaque, with the human brain showing a much larger component  
255 percentage in the corpus callosum. The larger percentage of the corpus callosum may also indicate a more  
256 efficient organization, as our previous study has shown the role of the corpus callosum in the efficiency  
257 of the brain network (Yeh et al., 2018), and the presence of the corpus callosum indicates a superior form  
258 of interhemispheric communication due to its shorter distance between the dorsal parts of the isocortex  
259 (Johnson et al., 1982, 1994). In this sense, the anterior commissure could be a remnant fiber tract and has  
260 mostly been replaced by the more efficient corpus callosum (Winter and Franz, 2014), and the decrease

261 of the anterior commissure in the human would allow for the corpus callosum to improve brain efficiency  
262 in information coding.

### 263 *Anterior commissure: a backup connection*

264 The anterior commissure and corpus callosum have been studied in patients with severed commissural  
265 pathways or agenesis of the corpus callosum, in which the corpus callosum and hippocampal commissure  
266 are naturally not present. It has been previously reported that for some cases, an enlarged anterior  
267 commissure may help compensate for the absence of the corpus callosum in individuals with callosal  
268 agenesis (Barr and Corballis, 2002). The neuronal axons may be re-routing to achieve better functional  
269 compensation. In cases of callosal agenesis, the anterior commissure is often found to be hypertrophied  
270 (Lemire et al., 1975) and may take on the role of substituting the transfer of information (Fischer et al.,  
271 1992; Barr and Corballis, 2002). This further suggests that the connections to the severed corpus callosum  
272 could be replaced with connections to the anterior commissure with the role that redundancy circuits of  
273 the commissures play for the brain. This indicates that the recruitment of the redundancy circuit can  
274 compensate for the role of the main circuit (i.e., the corpus callosum). However, the substitution cannot  
275 fully replace the role of the corpus callosum—it is not able to transfer information for spatial analysis in  
276 the case of callosal agenesis (Martin, 1985). Moreover, in certain cases, the redundancy circuits of the  
277 commissural pathways do not take over the role of the main circuit.

### 278 *Redundancy circuit and brain diseases*

279 The reduction of the anterior commissure in humans may leave the corpus callosum more vulnerable to  
280 dysconnectivity risk and might be the reason humans more commonly present these types of psychiatric  
281 disorders than non-human primates. This argument may be supported by the close relationship between  
282 the corpus callosum and psychiatric disorders (Bhatia et al., 2016, Brambilla et al., 2004, David et al.,

283 1993, Swayze et al., 1990). The existence of an occipital redundancy circuit may explain why  
284 schizophrenic patients have fewer visual hallucinations than audio hallucinations, as no redundancy  
285 circuits are innervating the primary auditory cortex in the commissures. Understanding the role that the  
286 commissures and the redundancy circuits play in the human brain can help us disentangle the sophisticated  
287 mechanism behind psychiatric disorders, most of which still have much unknown in the causality, and  
288 lead us to possible prevention or treatment for patients with these disorders.

## 289 **Acknowledgments**

290 We thank Jennifer L. Collinger, Steven Chase, and Ferdows Juya for their critical review of the  
291 manuscript. The research reported in this publication was supported by NIMH under award  
292 number R56MH113634. The content is solely the responsibility of the authors and does not necessarily  
293 represent the official views of the National Institutes of Health. Data were provided in part by the Human  
294 Connectome Project, WU-Minn Consortium (Principal Investigators: David Van Essen and Kamil  
295 Ugurbil; 1U54MH091657) funded by the 16 NIH Institutes and Centers that support the NIH Blueprint  
296 for Neuroscience Research; and by the McDonnell Center for Systems Neuroscience at Washington  
297 University.

298

## 299 **Author Contributions**

300 Z.G., J.B., and F.Y. performed analyses. A.E. performed cadaveric dissections. A.E., R.G., and Y.A.  
301 labeled dissection images. Z.G., J.B., and F.Y. wrote the manuscript.

## 302 **Competing Interests**

303 The authors declare that they have no competing interests.

## 304 **Materials and Methods**

### 305 *Human MRI experiments*

306 We conducted a subject-specific deterministic fiber tractography study in 30 right-handed, neurologically  
307 healthy male and female subjects with age range 23–35. The data came from the Human Connectome  
308 Project (HCP) online database [WU-Minn Consortium (Principal Investigators: David van Essen and  
309 Kamil Ugurbil; 1U54MH091657)] funded by the 16 NIH institutes and centers that support the NIH  
310 Blueprint for Neuroscience Research and by the McDonnell Center for Systems Neuroscience at  
311 Washington University (Van Essen et al., 2013). Likewise, data from 1021 individual HCP subjects were  
312 utilized to compile the averaged diffusion atlas.

313

314 For the human fiber tracts, a multishell diffusion scheme was used, and the b-values were 1000, 2000, and  
315 3000 s/mm<sup>2</sup>. The number of diffusion sampling directions were all 90. The in-plane resolution and the  
316 slice thickness were both 1.25 mm. The diffusion data were reconstructed in the MNI space using q-space  
317 diffeomorphic reconstruction (Yeh et al., 2011) to obtain the spin distribution function (Yeh et al., 2010).  
318 A diffusion sampling length ratio of 2.5 was used, and the output resolution was 1 mm.

319 ***Rhesus macaque MRI experiments***

320 A group average template was constructed from a total of 36 animal scans from the PRIMatE Data  
321 Exchange (PRIME-DE) ([http://fcon\\_1000.projects.nitrc.org/indi/indiPRIME.html](http://fcon_1000.projects.nitrc.org/indi/indiPRIME.html)) acquired at 5 different  
322 sites including UC Davis, Princeton University, University of Minnesota, Mount Sanai, and American  
323 Military University (Milham et al., 2018). Detailed acquisition parameters are described previously. The  
324 b-table was checked by an automatic quality control routine to ensure its accuracy (Schilling et al., 2019).  
325 The diffusion data were homogenized and reconstructed in the MNI space using q-space diffeomorphic  
326 reconstruction (Yeh et al., 2011) to obtain the spin distribution function (Yeh et al., 2010). A diffusion  
327 sampling length ratio of 1.25 was used. The reconstructed data were averaged to build a population  
328 average diffusion distribution template at 0.5 mm isotropic resolution.

329

330 In addition to the population-average template, we also conducted a subject-specific deterministic fiber  
331 tractography study in 36 rhesus macaque subjects. The diffusion data were reconstructed using generalized  
332 q-sampling imaging (Yeh et al., 2010) with a diffusion sampling length ratio of 1 to obtain the spin  
333 distribution function in the native space to enable subject-space fiber tracking.

334 ***Fiber tracking and analysis***

335 We performed diffusion fiber tracking using our proprietary and open-source software DSI Studio  
336 (<http://dsi-studio.labsolver.org>). A deterministic fiber tracking algorithm was implemented using DSI  
337 Studio software (Yeh et al., 2013). A seeding region was placed on the whole brain. The anisotropy  
338 threshold for the human and rhesus macaque was automatically determined using the default anisotropy  
339 threshold in DSI studio. The angular threshold was 75 degrees, and the step size was 1 mm. Tracts with a



340 length shorter than 30 or longer than 300 mm were discarded. The tracts were set to terminate if a total of  
341 10,000 or more tracts were calculated.

342

343 The protocol for mapping the anterior commissure for human and rhesus macaque subjects is summarized  
344 in Supp. Fig. 1. In the figure, the human HCP 1mm and INDI primate templates were used for visualization  
345 purposes. For the human fiber tract protocol, the left and right hemispheres were tracked separately to  
346 obtain the orbitofrontal, temporal, and occipital branches of the anterior commissure. The anterior  
347 commissure region from the HCP842 tractography atlas (Yeh et al., 2018) was used as a seed region  
348 (pink). A small terminating region was placed at the center of the anterior commissure (orange) and a  
349 region of interest (ROI) (blue) was placed next to the terminating region on the hemisphere that tracts  
350 were obtained. The small terminating region and the large region of interest were created using a sphere  
351 from the drawing options in DSI Studio. Supp. Fig. 1a shows how the left orbitofrontal tract (red) was  
352 obtained using the left lateral (green) and medial orbitofrontal (orange) lobes. Supp. Fig. 1b shows how  
353 the left temporal tract (green) was obtained using the left temporal regions, specifically the left amygdala  
354 (blue) and temporal pole (orange). Supp. Fig. 1c shows how the left occipital tract (blue) was obtained  
355 using the left\_lateral\_occipital region (blue). The orbitofrontal and occipital regions both come from the  
356 FreeSurferDKT atlas (<https://surfer.nmr.mgh.harvard.edu/>). The temporal regions come from the  
357 Automated Anatomical Labeling (AAL) atlas (Rolls et al., 2020). For all the branches, the right  
358 hemispheric fiber tracts were generated similarly except for changing the region of interest and the  
359 specified atlas regions to the corresponding right hemisphere. The fiber tracts were cleaned up by  
360 removing tracts that did not follow the tract of interest and were apparent to correspond to false tracts.

361

362 For the rhesus macaque fiber tract protocol, the left and right hemispheres were tracked separately to  
363 obtain the orbitofrontal, temporal, and occipital branches of the anterior commissure. The ROI region  
364 (pink) was created using a sphere from the drawing options in DSI Studio to track the anterior commissure  
365 in rhesus macaques. It was placed at the center of the sagittal view for obtaining all the fiber tract branches.  
366 Supp. Fig 1d, 1e, and 1f show the representative fiber tracts for the orbitofrontal, temporal, and occipital  
367 branches of the rhesus macaque anterior commissure, respectively. The branches were cleaned up by  
368 removing tracts that did not follow the tract of interest and were apparent to correspond to false tracts.

369  
370 We further calculated the volume fraction of the anterior commissure component and the corpus callosum  
371 component of the redundancy circuits. The volume fraction was calculated by dividing the volume of the  
372 tracks by the brain volume. We removed three outliers from the human data and six from the rhesus  
373 macaque whose values were more than three scaled median absolute deviations for both the anterior  
374 commissure and corpus callosum tracts. A two-sample unequal variances t-test was used to test the  
375 differences in the volume fractions of the redundancy circuits of the commissural pathways of the human  
376 and rhesus macaque brains. We also calculated the component percentage of the anterior commissure and  
377 corpus callosum component in each redundancy circuit and tested the differences using a two-sample  
378 unequal variances t-test.

### 379 *Connectogram*

380 For the human subjects, the connectivity matrix function in DSI studio was used to create matrices  
381 representing the number of fibers terminating within regions of the FreeSurferDKT atlas in reference to  
382 the terminating region used for fiber tracking. For the rhesus macaque subjects, the CIVM rhesus macaque  
383 atlas (Calabrese et al., 2015) was used in reference to the ROI used for fiber tracking of the rhesus macaque  
384 anterior commissure. In creating the connectivity matrix for both the human and rhesus macaque subjects,

385 the ROIs were specified as pass regions. Two connectivity matrices were created per subject  
386 corresponding to the left and right hemispheres. In total, 60 connectivity matrices were generated for the  
387 human subjects and 72 connectivity matrices were generated for the rhesus macaque subjects. The  
388 connectivity values were normalized and averaged across all the human and rhesus macaque subjects,  
389 respectively, to generate the connectogram.

### 390 *Cadaveric dissections*

391 The Klingler method (Ludwig and Klingler, 1956) was used for dissection of the human and rhesus  
392 macaque anterior commissure. Two human (4 hemispheres) and two rhesus macaque (4 hemispheres)  
393 brains were prepared for dissection by first fixing them in a 10% formalin solution for 2-4 weeks. After  
394 fixation, the brains were frozen at -16C for 2-3 weeks, and dissection commenced 24h after the specimens  
395 were thawed. The first steps consisted of careful removal of the arachnoid and superficial vessels followed  
396 by a step-wise, superficial-to-deep dissection. Wooden spatulas were used to remove successive layers of  
397 gray matter followed by white matter to reveal the anterior commissure. In between dissections, specimens  
398 were stored in 10% formalin solution. High- quality photographs were taken before dissection to identify  
399 sulci and gyri and then as the dissection proceeded to localize other white fiber pathways. Photographs  
400 were inverted using Pixlr Editor for another method of visualizing the fiber pathways. The inverted images  
401 for the human and rhesus macaque dissections are included in the supplementary material (Fig. S4 and  
402 S5, respectively) (Sevandersson, 2020).

403

404

## 405 REFERENCES

- 406 1. Marsman, A., Mandl, R. C. W., Klomp, D. W. J., Cahn, W., Kahn, R. S., Lijten, P. R., & Hulshoff  
407 Pol, H. E. (2017). Intelligence and Brain Efficiency: Investigating the Association between Working  
408 Memory Performance, Glutamate, and GABA. *Frontiers in Psychiatry*, **8**.  
409 <https://doi.org/10.3389/fpsy.2017.00154>
- 410
- 411 2. Pryluk, R., Kfir, Y., Gelbard-Sagiv, H., Fried, I., & Paz, R. (2019). A Tradeoff in the Neural Code  
412 across Regions and Species. *Cell*, **176**(3), 597-609.e18. <https://doi.org/10.1016/j.cell.2018.12.032>
- 413
- 414 3. Bullmore, E., & Sporns, O. (2009). Complex brain networks: Graph theoretical analysis of structural  
415 and functional systems. *Nature Reviews Neuroscience*, **10**(3), 186–198. <https://doi.org/10.1038/nrn2575>
- 416
- 417 4. Yeh, F.-C., Panesar, S., Fernandes, D., Meola, A., Yoshino, M., Fernandez-Miranda, J. C., Vettel, J.  
418 M., & Verstynen, T. (2018). Population-Averaged Atlas of the Macroscale Human Structural  
419 Connectome and Its Network Topology. *NeuroImage*, **178**, 57–68.  
420 <https://doi.org/10.1016/j.neuroimage.2018.05.027>
- 421
- 422 5. Sporns, O., Chialvo, D. R., Kaiser, M., & Hilgetag, C. C. (2004). Organization, development, and  
423 function of complex brain networks. *Trends in Cognitive Sciences*, **8**(9), 418–425.  
424 <https://doi.org/10.1016/j.tics.2004.07.008>
- 425

- 426 6. Stam, C. J. (2004). Functional connectivity patterns of human magnetoencephalographic recordings:  
427 A “small-world” network? *Neuroscience Letters*, **355(1–2)**, 25–28.  
428 <https://doi.org/10.1016/j.neulet.2003.10.063>  
429
- 430 7. Eguíluz, V. M., Chialvo, D. R., Cecchi, G. A., Baliki, M., & Apkarian, A. V. (2005). Scale-Free Brain  
431 Functional Networks. *Physical Review Letters*, **94(1)**, 018102.  
432 <https://doi.org/10.1103/PhysRevLett.94.018102>  
433
- 434 8. Achard, S., Salvador, R., Whitcher, B., Suckling, J., & Bullmore, E. (2006). A Resilient, Low-  
435 Frequency, Small-World Human Brain Functional Network with Highly Connected Association Cortical  
436 Hubs. *Journal of Neuroscience*, **26(1)**, 63–72. <https://doi.org/10.1523/JNEUROSCI.3874-05.2006>  
437
- 438 9. Heuvel, M. P. van den, Stam, C. J., Kahn, R. S., & Pol, H. E. H. (2009). Efficiency of Functional  
439 Brain Networks and Intellectual Performance. *Journal of Neuroscience*, **29(23)**, 7619–7624.  
440 <https://doi.org/10.1523/JNEUROSCI.1443-09.2009>  
441
- 442 10. Glasser, M. F., Coalson, T. S., Robinson, E. C., Hacker, C. D., Harwell, J., Yacoub, E., ... Van  
443 Essen, D. C. (2016). A multi-modal parcellation of human cerebral cortex. *Nature*, **536(7615)**, 171–178.  
444 <https://doi.org/10.1038/nature18933>  
445
- 446 11. Calabrese, E., Badea, A., Coe, C. L., Lubach, G. R., Shi, Y., Styner, M. A., & Johnson, G. A. (2015).  
447 A diffusion tensor MRI atlas of the postmortem rhesus macaque brain. *NeuroImage*, **117**, 408–416.  
448 <https://doi.org/10.1016/j.neuroimage.2015.05.072>

- 449 12. Mooshagian, E. (2008). Anatomy of the corpus callosum reveals its function. *The Journal of*  
450 *Neuroscience: The Official Journal of the Society for Neuroscience*, **28(7)**, 1535–1536.  
451 <https://doi.org/10.1523/JNEUROSCI.5426-07.2008>  
452
- 453 13. Goldstein, A., Covington, B. P., Mahabadi, N., & Mesfin, F. B. (2019). Neuroanatomy, Corpus  
454 Callosum. In *StatPearls*. Retrieved from <http://www.ncbi.nlm.nih.gov/books/NBK448209/>  
455
- 456 14. Johnson, J. I., Iii, R. C. S., & Kirsch, J. A. W. (1982). Phylogeny through Brain Traits: The  
457 Distribution of Categorizing Characters in Contemporary Mammals. *Brain, Behavior and Evolution*,  
458 **20(1–2)**, 97–117. <https://doi.org/10.1159/000121584>  
459
- 460 15. Johnson, J. I., Kirsch, J. A. W., Reep, R. L., & Iii, R. C. S. (1994). Phylogeny through Brain Traits:  
461 More Characters for the Analysis of Mammalian Evolution. *Brain, Behavior and Evolution*, **43(6)**, 319–  
462 347. <https://doi.org/10.1159/000113643>  
463
- 464 16. Winter, T. J., & Franz, E. A. (2014). Implication of the anterior commissure in the allocation of  
465 attention to action. *Frontiers in Psychology*, **5**. <https://doi.org/10.3389/fpsyg.2014.00432>  
466
- 467 17. Barr, Melodie S., and Michael C. Corballis. “The Role of the Anterior Commissure in Callosal  
468 Agenesis.” *Neuropsychology* **16**, no. 4 (October 2002): 459–71.  
469
- 470 18. Lemire R J, Loeser J D, Leech R W, Alvord E C (1975) Normal and Abnormal Development of The  
471 Human Nervous System. Hagerstown, Maryland: Harper and Row, pp. 260-277.

- 472 19. Fischer, M., Ryan, S. B., & Dobyns, W. B. (1992). Mechanisms of interhemispheric transfer and  
473 patterns of cognitive function in acallosal patients of normal intelligence. *Archives of Neurology*, **49(3)**,  
474 271–277. <https://doi.org/10.1001/archneur.1992.00530270085023>  
475
- 476 20. Martin, Alex. “A qualitative limitation of visual transfer via the anterior commissure: evidence from  
477 a case a callosal agenesis.” *Brain* **108**, no. 1 (March 1, 1985): 43–63.  
478 <https://doi.org/10.1093/brain/108.1.43>.  
479
- 480 21. Bhatia, M. S., Saha, R., & Doval, N. (2016). Delusional Disorder in a Patient with Corpus Callosum  
481 Agenesis. *Journal of Clinical and Diagnostic Research : JCDR*, **10(12)**, VD01–VD02.  
482 <https://doi.org/10.7860/JCDR/2016/21803.9059>  
483
- 484 22. Brambilla, P., Nicoletti, M., Sassi, R. B., Mallinger, A. G., Frank, E., Keshavan, M. S., & Soares, J.  
485 C. (2004). Corpus callosum signal intensity in patients with bipolar and unipolar disorder. *Journal of*  
486 *Neurology, Neurosurgery & Psychiatry*, **75(2)**, 221–225. <https://doi.org/10.1136/jnnp.2002.002014>  
487
- 488 23. David, A. S., Wacharasindhu, A., & Lishman, W. A. (1993). Severe psychiatric disturbance and  
489 abnormalities of the corpus callosum: Review and case series. *Journal of Neurology, Neurosurgery, and*  
490 *Psychiatry*, **56(1)**, 85–93.  
491
- 492 24. Swayze, V. W., Andreasen, N. C., Ehrhardt, J. C., Yuh, W. T. C., Alliger, R. J., & Cohen, G. A.  
493 (1990). Developmental Abnormalities of the Corpus Callosum in Schizophrenia. *Archives of Neurology*,  
494 **47(7)**, 805–808. <https://doi.org/10.1001/archneur.1990.00530070103018>

- 495 25. Van Essen, D. C., Smith, S. M., Barch, D. M., Behrens, T. E. J., Yacoub, E., Ugurbil, K., & WU-  
496 Minn HCP Consortium. (2013). The WU-Minn Human Connectome Project: An overview.  
497 *NeuroImage*, **80**, 62–79. <https://doi.org/10.1016/j.neuroimage.2013.05.041>  
498
- 499 26. Yeh, F.-C., Wedeen, V. J., & Tseng, W.-Y. I. (2011). Estimation of fiber orientation and spin density  
500 distribution by diffusion deconvolution. *NeuroImage*, **55**(3), 1054–1062.  
501 <https://doi.org/10.1016/j.neuroimage.2010.11.087>  
502
- 503 27. Yeh, F.-C., Wedeen, V. J., & Tseng, W.-Y. I. (2010). Generalized q-Sampling Imaging. *IEEE*  
504 *Transactions on Medical Imaging*, **29**(9), 1626–1635. <https://doi.org/10.1109/TMI.2010.2045126>  
505
- 506 28. Milham, M. P., Ai, L., Koo, B., Xu, T., Amiez, C., Balezeau, F., Baxter, M. G., Blezer, E. L. A.,  
507 Brochier, T., Chen, A., Crosson, P. L., Damatac, C. G., Dehaene, S., Everling, S., Fair, D. A., Fleysher,  
508 L., Freiwald, W., Froudin-Walsh, S., Griffiths, T. D., ... Schroeder, C. E. (2018). An Open Resource for  
509 Non-human Primate Imaging. *Neuron*, **100**(1), 61-74.e2. <https://doi.org/10.1016/j.neuron.2018.08.039>  
510
- 511 29. Schilling, K. G., Nath, V., Hansen, C., Parvathaneni, P., Blaber, J., Gao, Y., Neher, P., Aydogan, D.  
512 B., Shi, Y., Ocampo-Pineda, M., Schiavi, S., Daducci, A., Girard, G., Barakovic, M., Rafael-Patino, J.,  
513 Romascano, D., Rensonnet, G., Pizzolato, M., Bates, A., ... Landman, B. A. (2019). Limits to  
514 anatomical accuracy of diffusion tractography using modern approaches. *NeuroImage*, **185**, 1–11.  
515 <https://doi.org/10.1016/j.neuroimage.2018.10.029>  
516



517 30. Yeh, Fang-Cheng, Timothy D. Verstynen, Yibao Wang, Juan C. Fernández-Miranda, and Wen-Yih  
518 Isaac Tseng. “Deterministic Diffusion Fiber Tracking Improved by Quantitative Anisotropy.” *PLoS*  
519 *ONE* **8**, no. 11 (November 15, 2013). <https://doi.org/10.1371/journal.pone.0080713>.

520

521 31. Rolls, E. T., Huang, C.-C., Lin, C.-P., Feng, J., & Joliot, M. (2020). Automated anatomical labelling  
522 atlas 3. *NeuroImage*, **206**, 116189. <https://doi.org/10.1016/j.neuroimage.2019.116189>

523

524 32. Ludwig, E., and Klingler, J. (1956). *Atlas Cerebri Humani: Der Innere Bau des Gehirns Dargestellt*  
525 *auf Grund Makroskopischer Präparate: The Inner Structure of the Brain Demonstrated on the Basis of*  
526 *Macroscopical Preparations: La Structure Interne du Cerveau Démontrée sur les Préparations*  
527 *Macroscopiques: La Arquitectura Interna del Cerebro Demostrada Mediante Preparaciones*  
528 *Macroscópicas*. Boston, MA: Little, Brown.

529

530

531

532

533

534

535

536 **Figures**

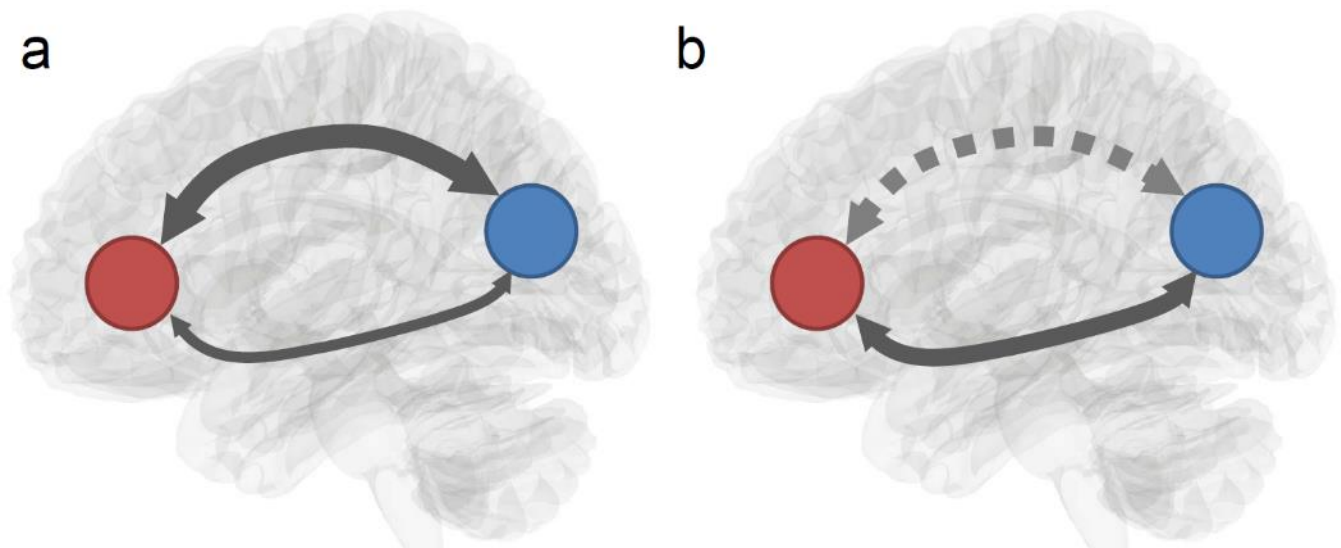

537

538 **Figure 1:** Schematic illustration of a redundancy circuit. (a) A redundancy circuit has two distinctly  
539 separated white matter pathways connecting two common functional areas to form robustness in  
540 connectivity. (b) An injury or agenesis of one white matter pathway in the redundancy circuit may disrupt  
541 one connection. However, the information exchange between the innervated regions is not entirely  
542 interrupted due to the existence of an alternate pathway connecting to them.

543

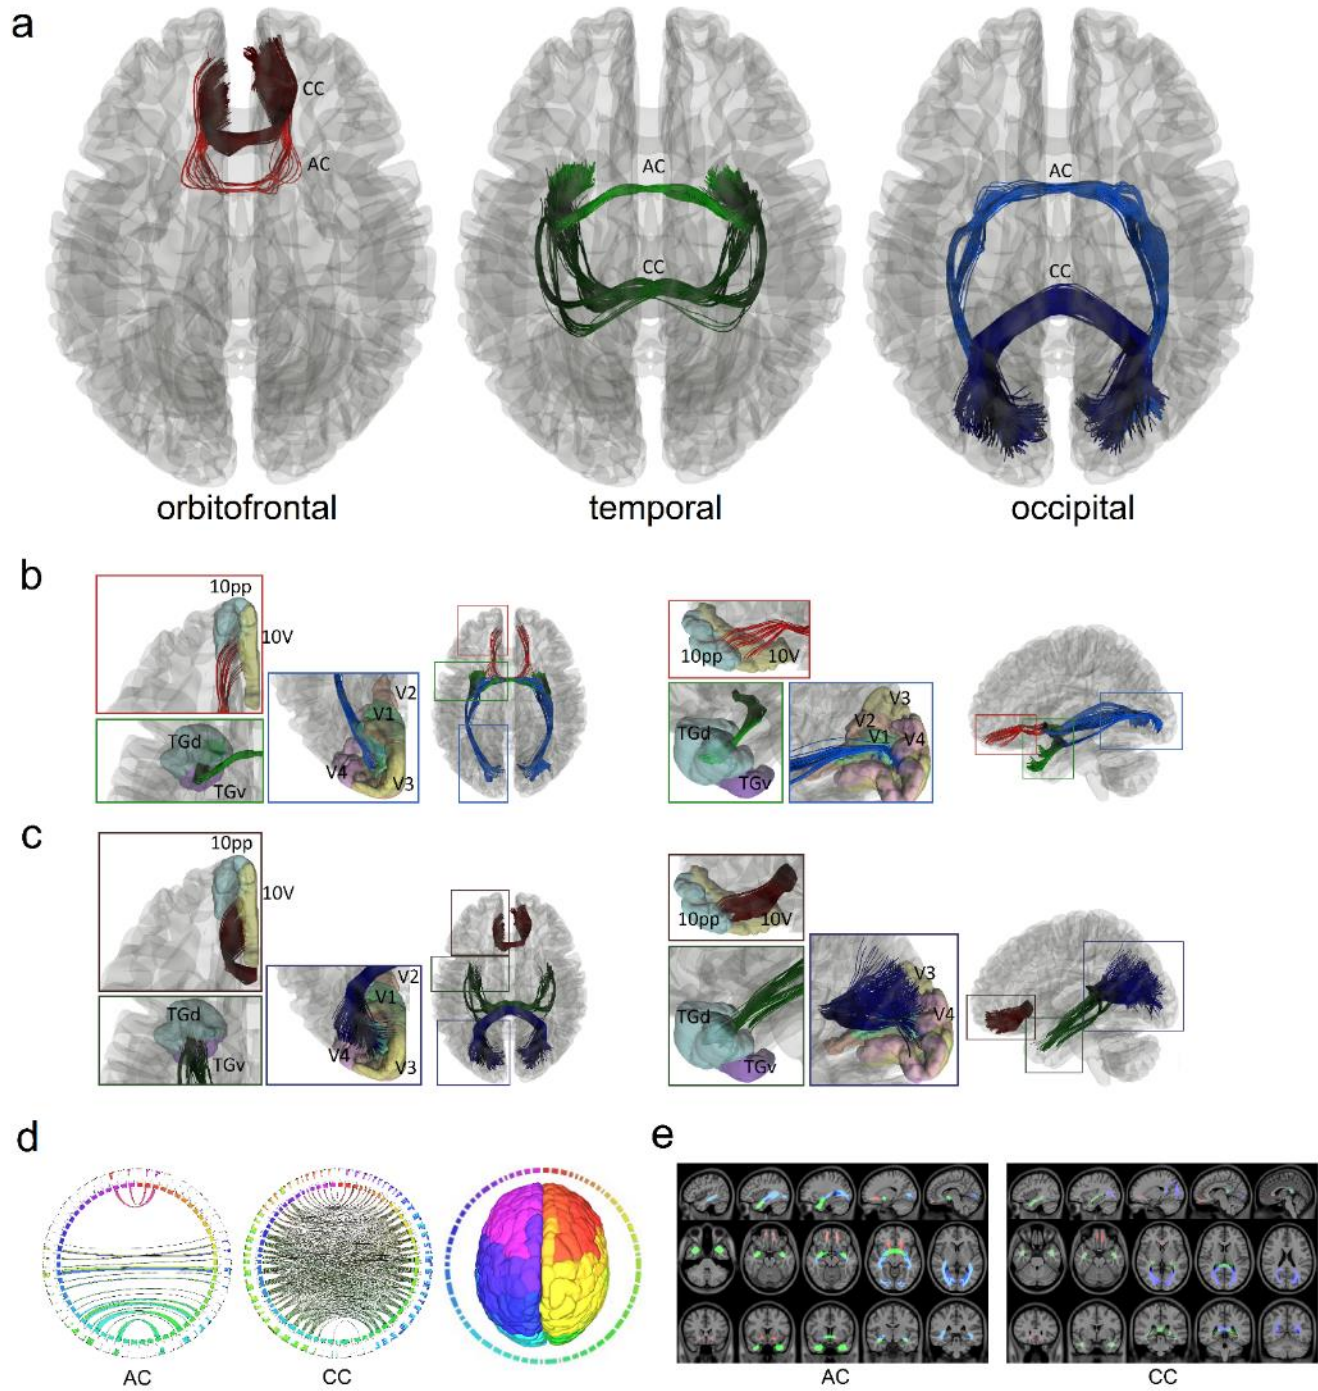

544

545 **Figure 2:** Redundancy circuits of the commissural pathways identified in the human brain. (a) The  
 546 tractogram shows the fiber tracts composition of the orbitofrontal (red), temporal (green), and occipital  
 547 (blue) redundancy circuits. Each of them connects two cortical regions with two distinctly different  
 548 connection routes through anterior commissure and the corpus callosum. (b) The two tractograms show

549 the anterior commissure components of the three redundancy circuits in axial and sagittal views. The  
550 orbitofrontal component (red) connects between left-right 10pp and 10v. The temporal (green) component  
551 connects primarily to the left and right TGd and TGv region. The occipital (blue) component connects V1  
552 primarily, and partly to V2, V3, and V4. (c) The two tractograms show the corpus callosum components  
553 of the three redundancy circuits in axial and sagittal views. The three components (red, green, blue) also  
554 connect to the same cortical regions of their anterior commissure counterpart but through a completely  
555 different route in the midsagittal plane. (d) Connectograms represents bilateral connectivity patterns of  
556 the average human anterior commissure and corpus callosum, confirming that these two commissure  
557 pathways connect to common parcellated region pairs. (e) The white matter map of the anterior  
558 commissure and corpus callosum forming the redundancy circuits confirms that their connections travel  
559 through entirely different routes. AC = anterior commissure, CC = corpus callosum.

560

561



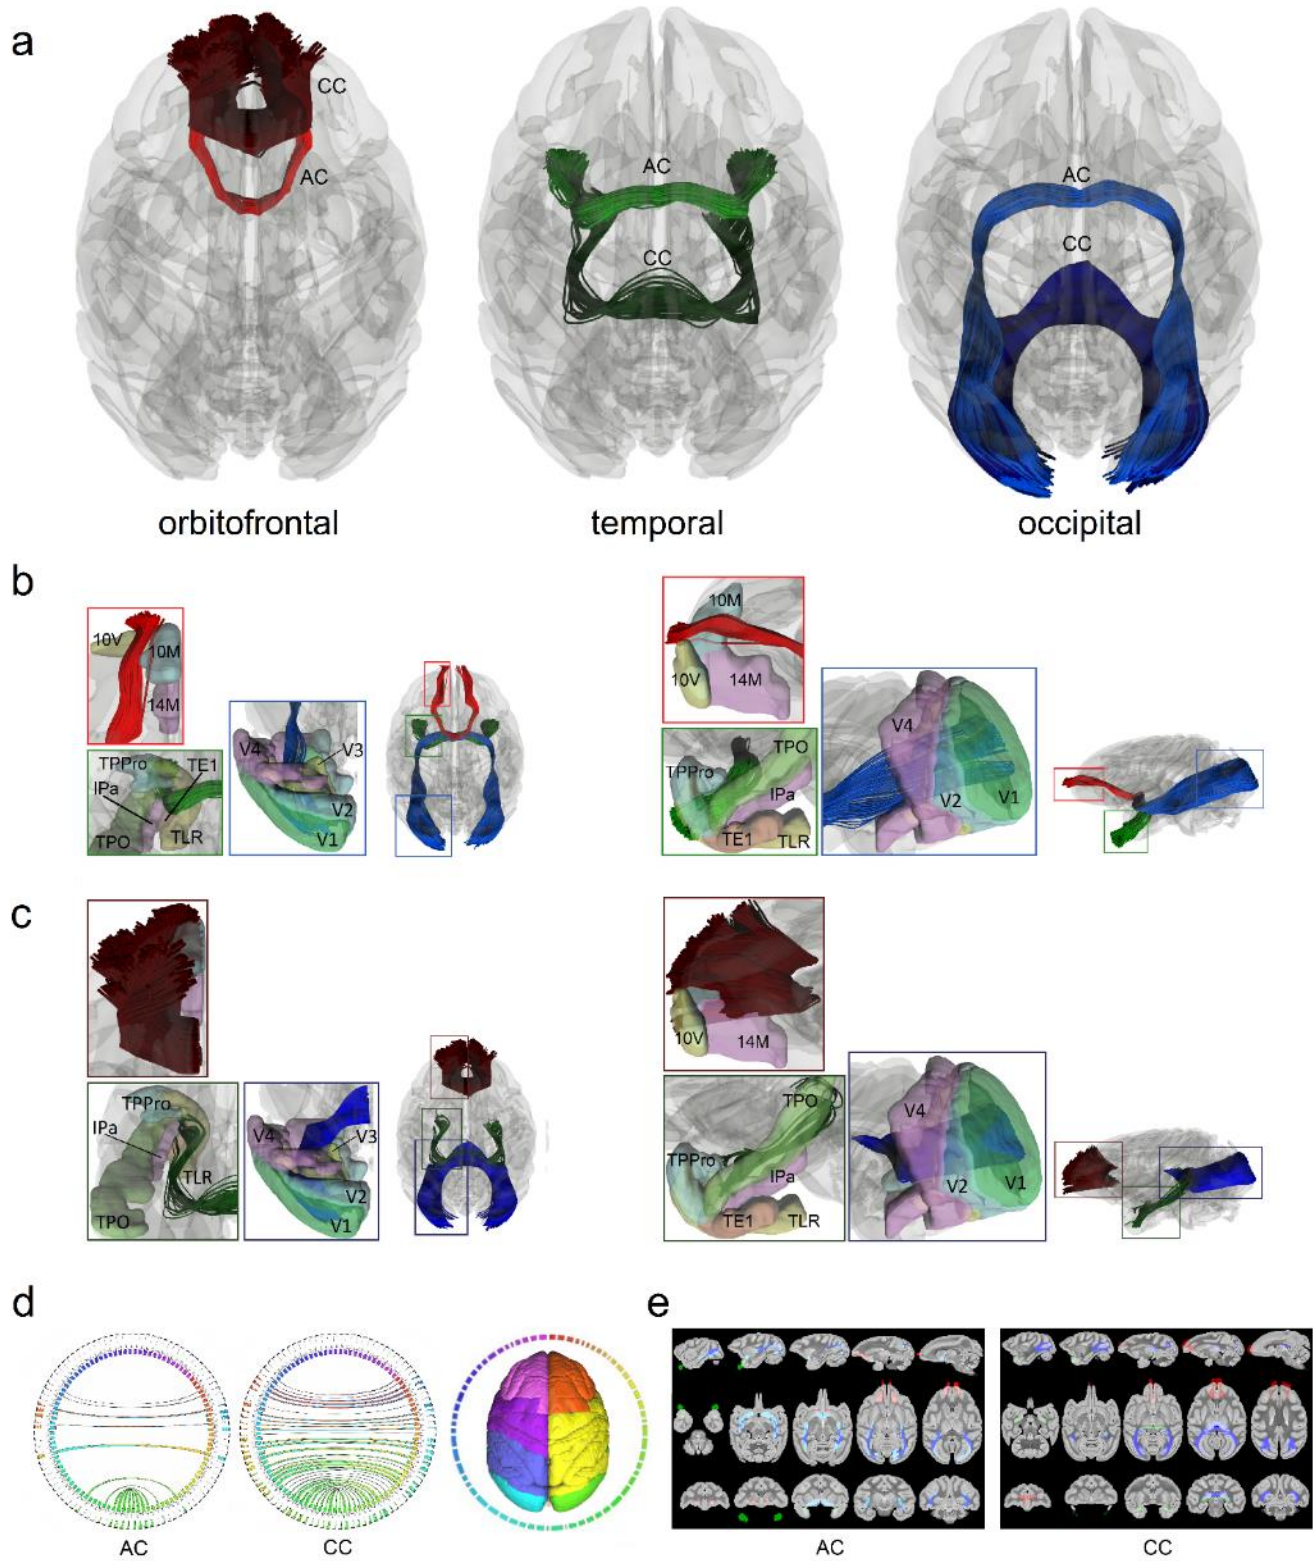

562

563 **Figure 3:** Redundancy circuits of the commissural pathways identified in the rhesus macaque brain. (a)

564 The tractogram shows the fiber tracts composition of the orbitofrontal (red), temporal (green), and

565 occipital (blue) redundancy circuits. Each of them connects two cortical regions with two distinctly  
566 different connections route through anterior commissure and the corpus callosum. (b) The two tractograms  
567 show the anterior commissure components of the three redundancy circuits in axial and sagittal views.  
568 The orbitofrontal component (red) connects between left-right 10M and 10V, while some connections are  
569 to 14M. The temporal (green) component connects primarily to the left and right TPPro region while other  
570 fibers continue to TLR(R36) and TPO regions. The occipital (blue) component connects V1 primarily. (c)  
571 The two tractograms show the corpus callosum components of the three redundancy circuits in axial and  
572 sagittal views. The three components (red, green, blue) also connect to the same cortical regions of their  
573 anterior commissure counterpart but through a completely different route in the midsagittal plane. (d)  
574 Connectograms represents bilateral connectivity patterns of the average human anterior commissure and  
575 corpus callosum, confirming that these two commissure pathways connect to common parcellated region  
576 pairs. (e) The white matter map of the anterior commissure and corpus callosum forming the redundancy  
577 circuits confirms that their connections travel through entirely different routes. AC = anterior commissure,  
578 CC = corpus callosum.

579  
580  
581  
582



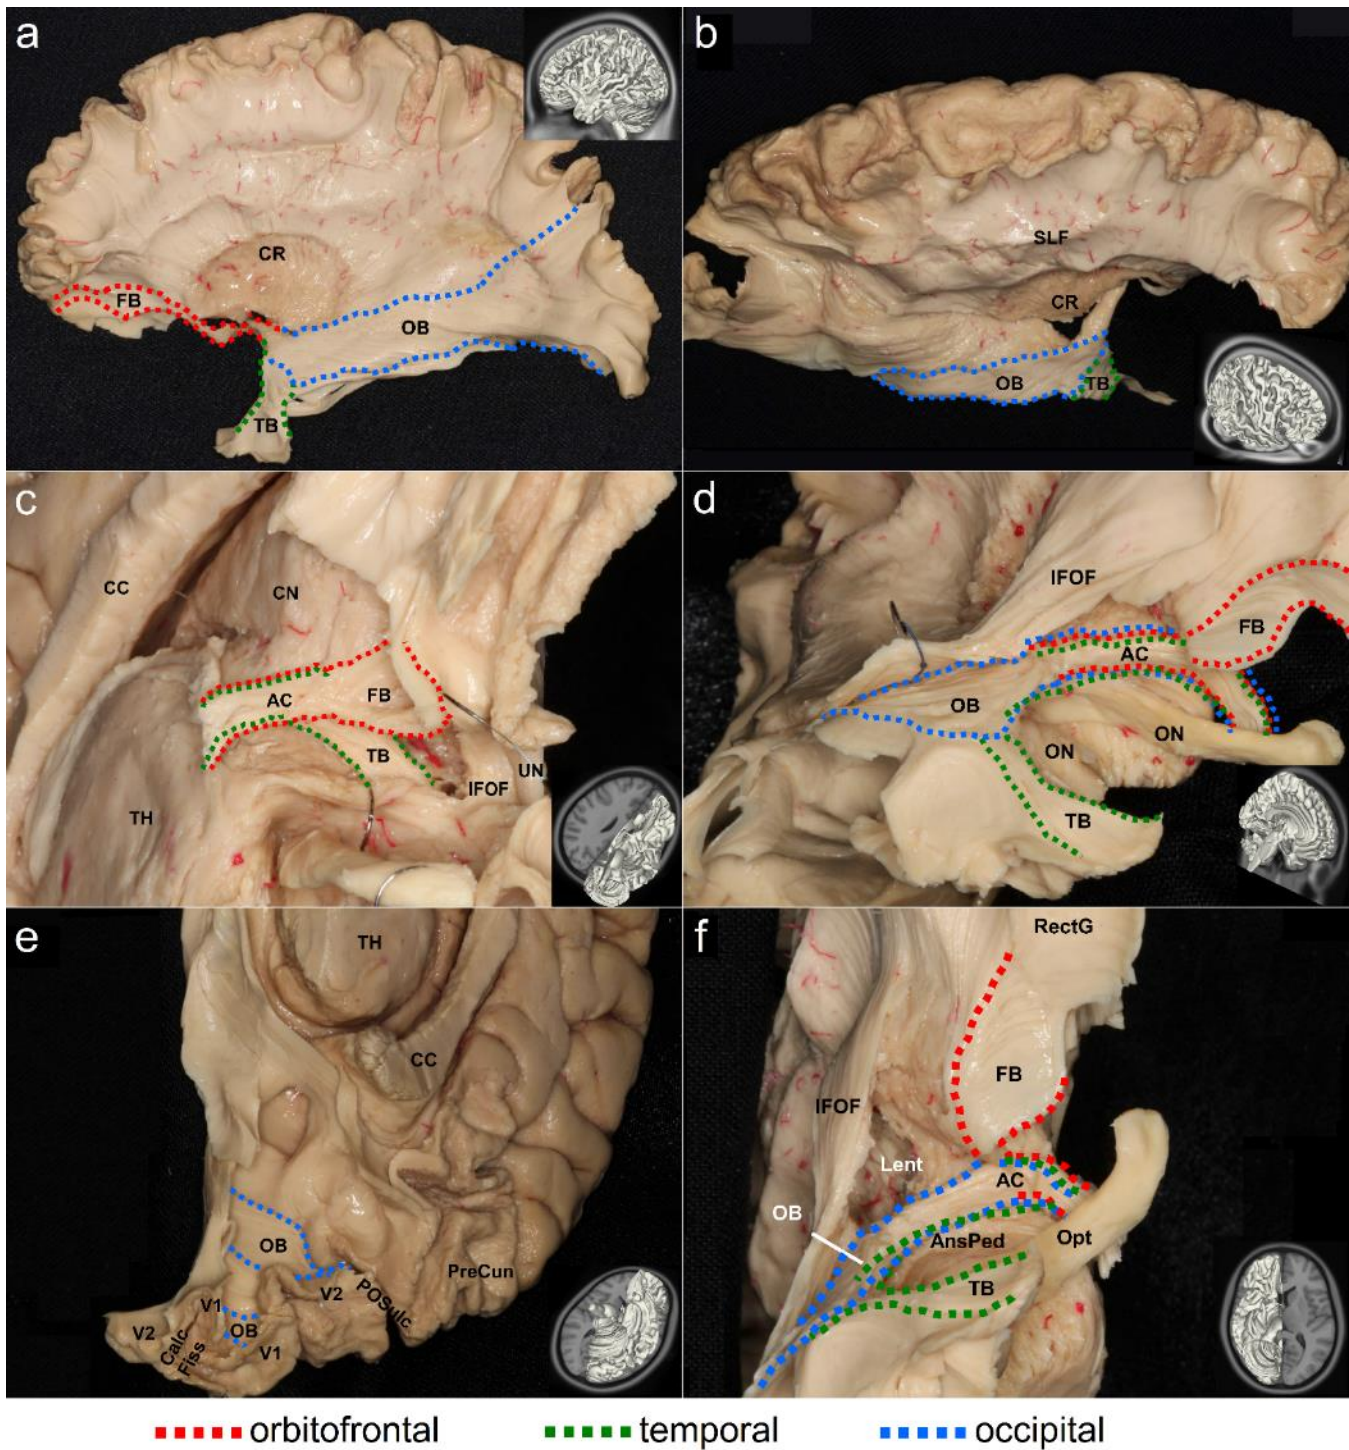

584 **Figure 4:** Cadaveric dissection of the anterior commissure that is part of the redundancy circuits of the  
585 commissural pathways in the human brain. The different branches of the anterior commissure are shown  
586 in dotted lines with red indicating projections to the orbitofrontal regions, green indicating connections to

587 the temporal regions, and blue indicating projections to the occipital regions. The dissection photo views  
588 the anterior commissure from left-lateral (a), right-anterior-lateral (b), and inferior-lateral views (c,d,e,f)  
589 of the anterior commissure. The orbitofrontal branch travels through the midsagittal plane and connects  
590 the bilateral lower orbitofrontal regions (c,d,f). The temporal branch also travels through the same  
591 midsagittal region and connects the bilateral amygdaloid region (c,d,f). The occipital branch similarly  
592 travels through the midline and connects the bilateral visual cortices (d,e,f). The connecting route of the  
593 fiber pathways for each redundancy circuit matches the findings from diffusion magnetic resonance  
594 imaging (MRI) fiber tracking.

595

596

597

598



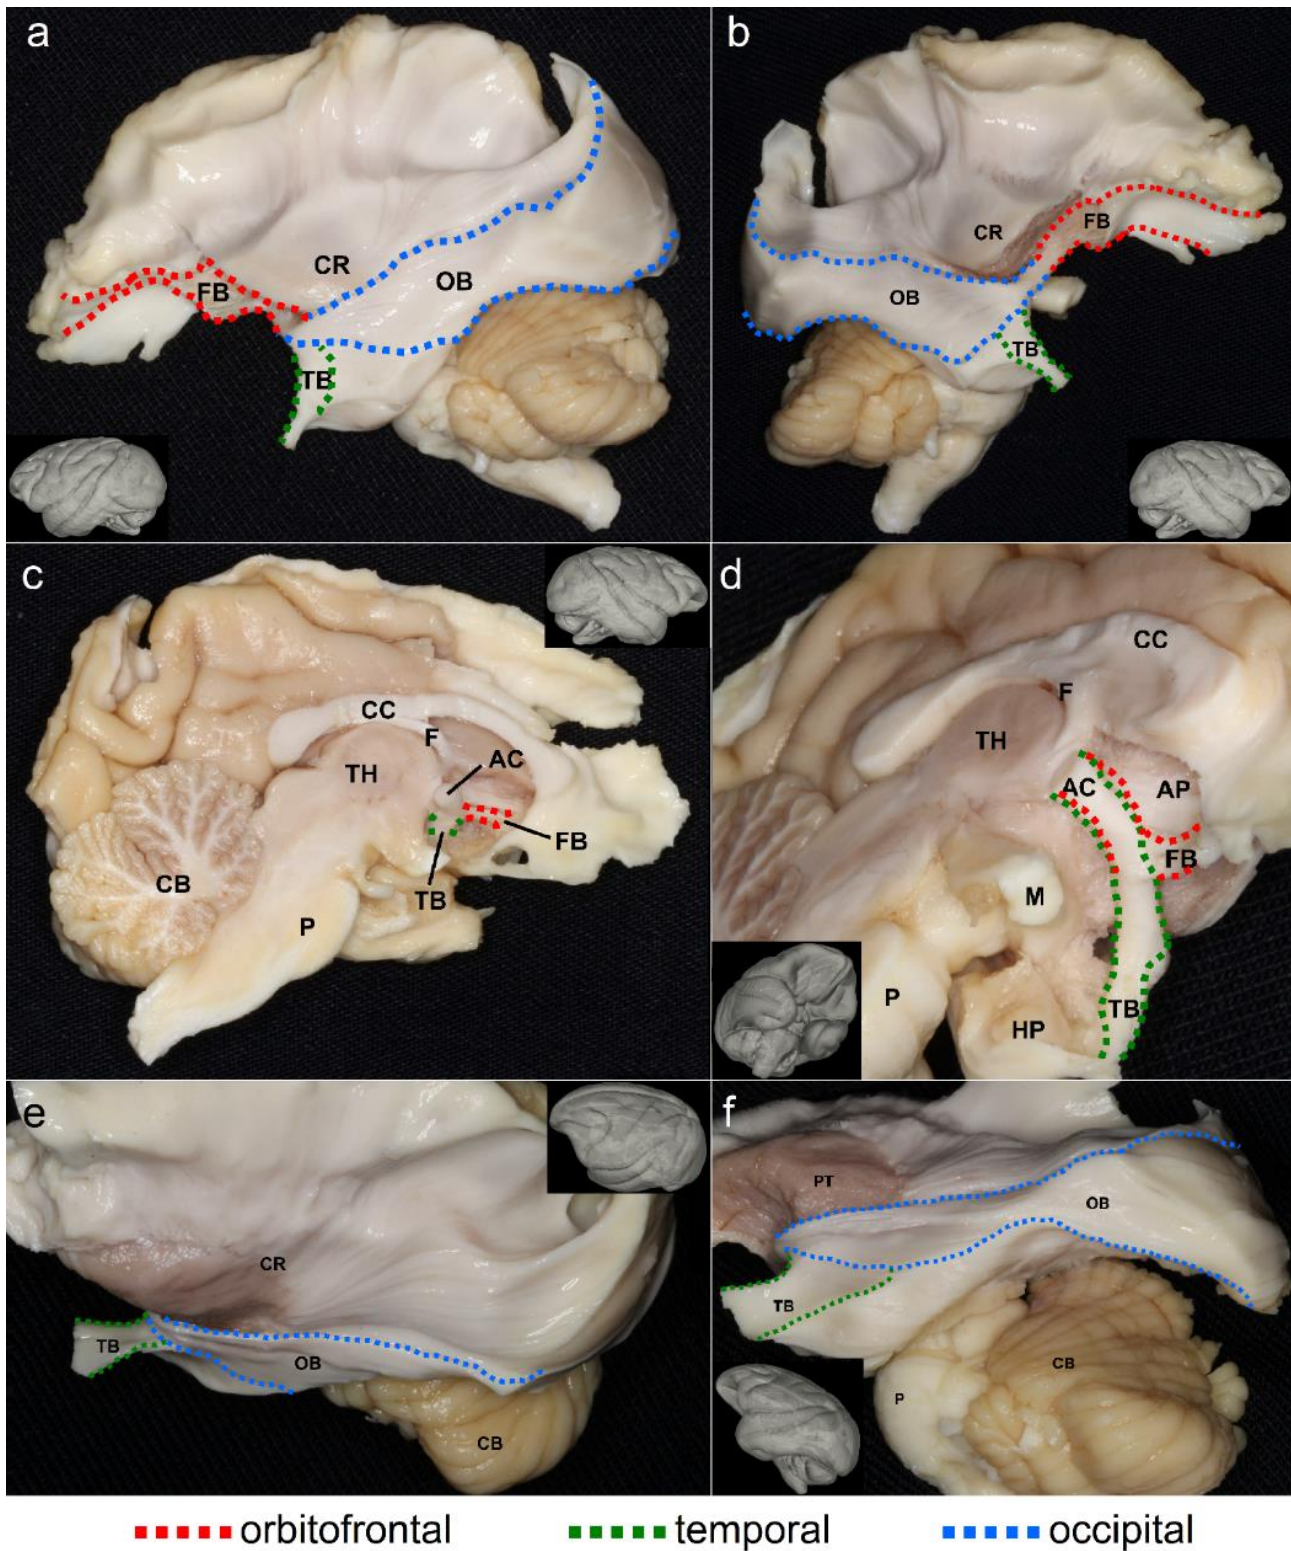

599

600 **Figure 5:** Cadaveric dissection of the anterior commissure that is part of the redundancy circuits of the

601 commissural pathways in the rhesus macaque brain. The different branches of the anterior commissure

602 are shown in dotted lines with red indicating projections to the orbitofrontal regions, green indicating  
603 connections to the temporal regions, and blue indicating projections to the occipital regions. The dissection  
604 photo views the anterior commissure from left-lateral (a, e, f), right-lateral (b), right-midsagittal (c), and  
605 inferior-lateral (d) views of the anterior commissure. The orbitofrontal branch travels through the  
606 midsagittal plane and connects the bilateral lower orbitofrontal regions (a,b,c,d). The temporal branch  
607 also travels through the same midsagittal region and connects the bilateral amygdaloid region (a,b,c,d).  
608 The occipital branch similarly travels through the midline and connects the bilateral visual cortices  
609 (a,b,e,f). The connecting route of the fiber pathways for each redundancy circuit matches the findings  
610 from diffusion magnetic resonance imaging (MRI) fiber tracking.

611

612

613

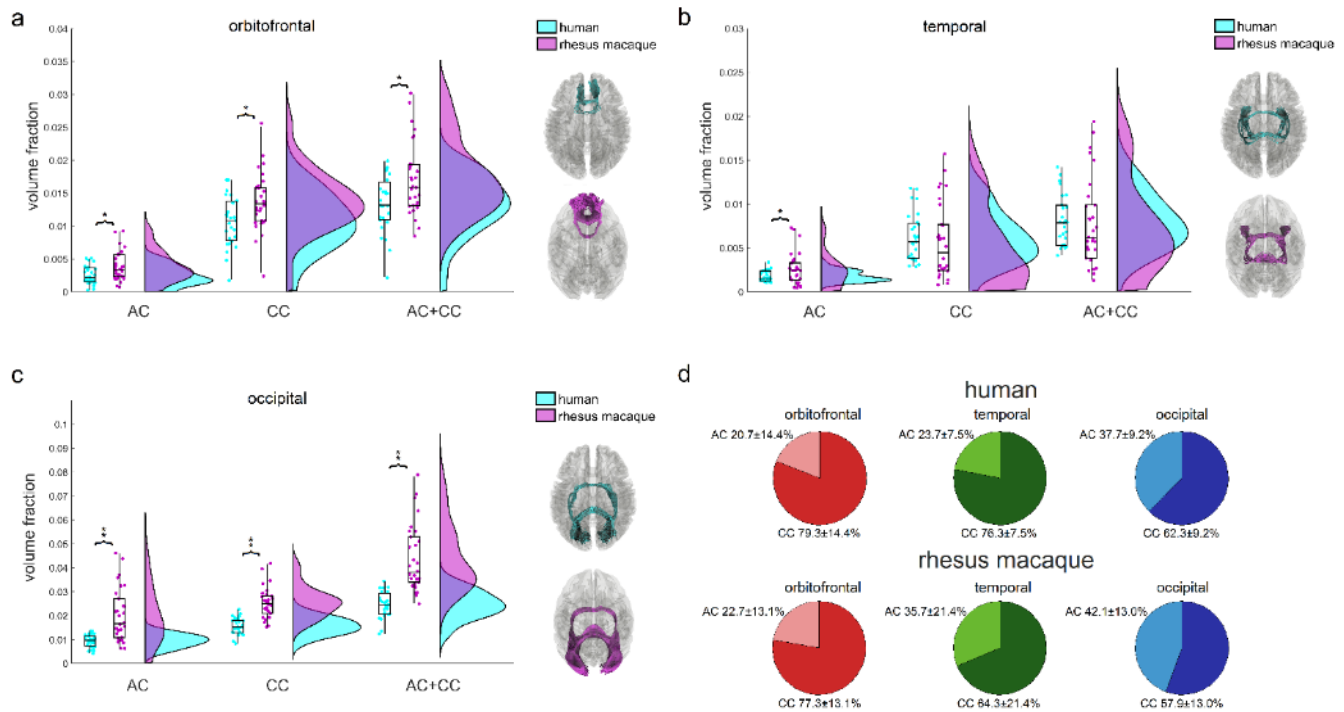

614

615 **Figure 6:** Quantitative analysis comparing the volumetrics of redundancy circuits between human and  
616 rhesus macaque commissural pathways. The volumes of the pathways are normalized against brain size  
617 to calculate the volume fraction for comparison. The box-raincloud plot shows the volume fractions for  
618 the anterior commissure component, corpus callosum component, and their sum in the orbitofrontal (a),  
619 temporal (b), and occipital (c) redundancy circuits. The human brain shows a general trend of volumetric  
620 reduction in the redundancy circuits of the commissural pathways. The orbitofrontal redundancy circuit  
621 and its two component connections are all significantly smaller in the human brain ( $* < 0.05$ ), whereas  
622 the occipital redundancy circuit also shows the same findings with a greater significance ( $** < 0.01$ ). In  
623 contrast, the temporal redundancy circuit only shows a smaller volume fraction of the anterior commissure  
624 component in the human ( $* < 0.05$ ). (d) The pie charts show the volumetric percentages between the  
625 anterior commissure and the corpus callosum components of the redundancy circuits. The percentage in  
626 the temporal redundancy circuit shows a significant difference between human and rhesus macaque. AC

627 = anterior commissure, CC = corpus callosum, AC+CC = combined anterior commissure and corpus  
628 callosum.
